# Supplementary material for: High-efficiency of 15.47% for two-dimensional perovskite solar cells processed by blade coating with non-thermal assistance
Source: Royal Society of Chemistry journal article supplement (doi:10.1039/d1tc01926k), 2021-01-01
Supplement: d1tc01926k1.pdf [file d1tc01926k1.pdf]

## Supporting Information

**High-efficiency of 15.47% for two-dimensional perovskite solar cells processed by blade coating with non-thermal assistance.**

Guangbao Wu\*, Nafees Ahmad and Yuan Zhang\*

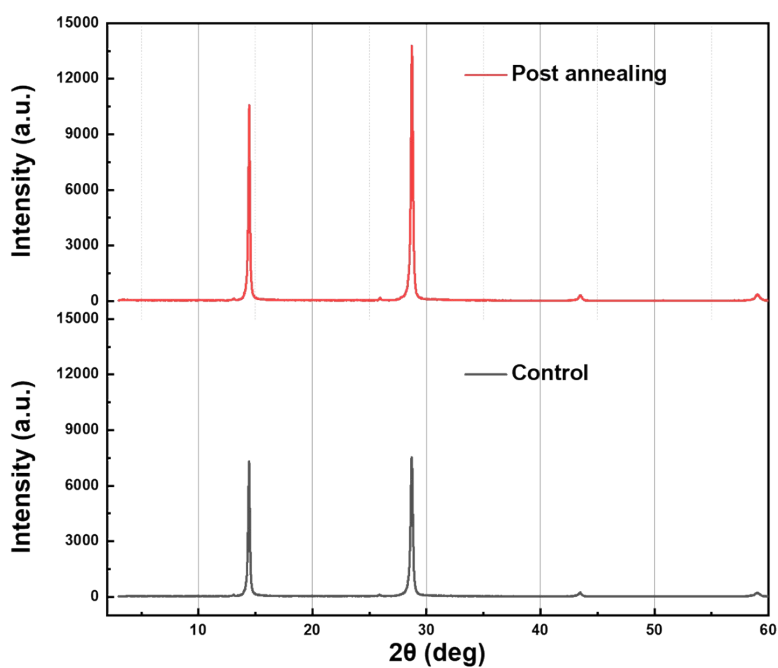

**Figure S 1.** XRD patterns for blade-coated  $\text{BA}_2\text{MA}_3\text{Pb}_4\text{I}_{13}$  films before and after post-annealing.

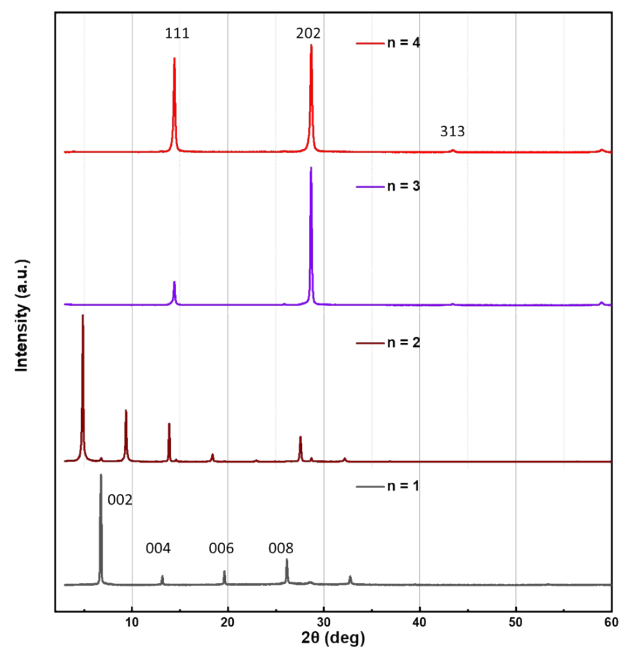

Figure S2. The XRD patterns for BA-based perovskite (spin-coated) with different values of  $n$ .

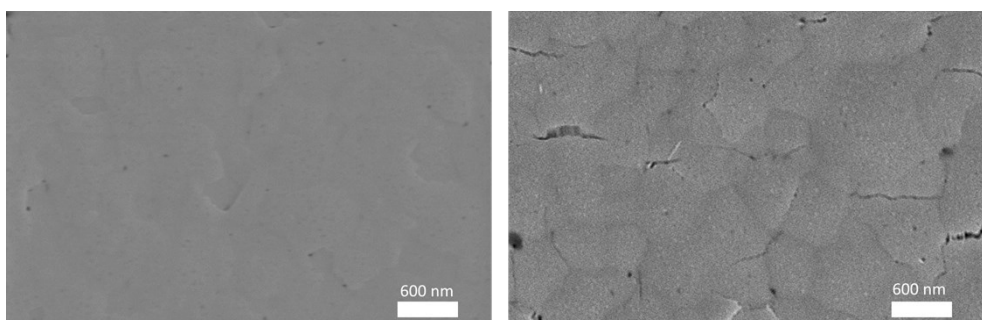

Figure S3. SEM images for two kinds of the film under a smaller field of view. (Left: blade-coated film; Right: spin-coated film)

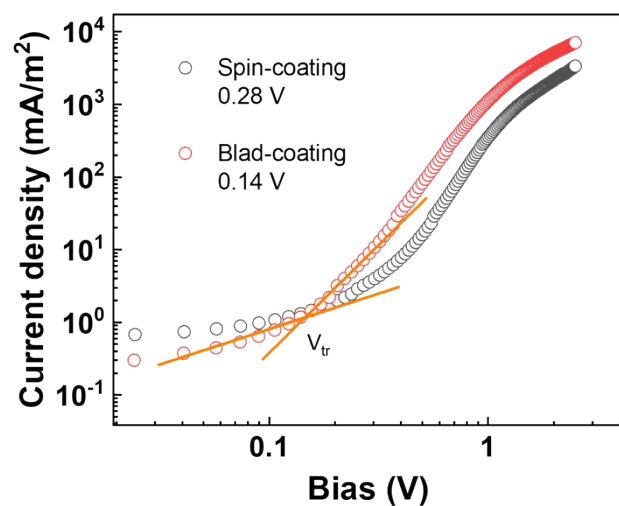

Figure S4. Dark  $J$ - $V$  characteristics of electron-only devices based on spin and blade coated 2D perovskite active layers.

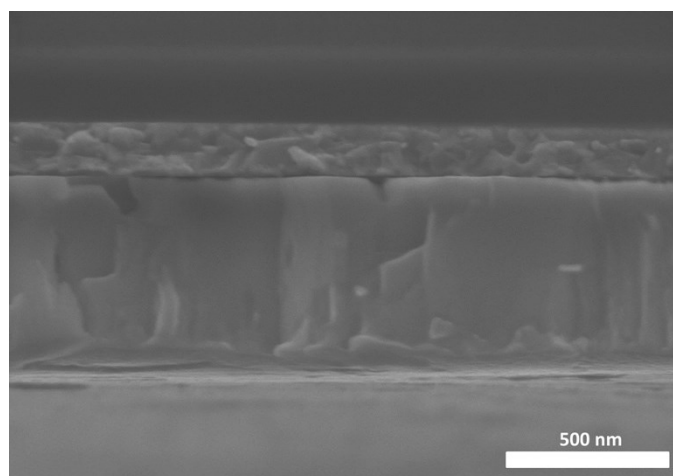

Figure S5. Cross-section scanning electron microscopy image of a 2D PSC based on blade-coated  $\text{BA}_2\text{MA}_3\text{Pb}_4\text{I}_{13}$  photo-absorber.

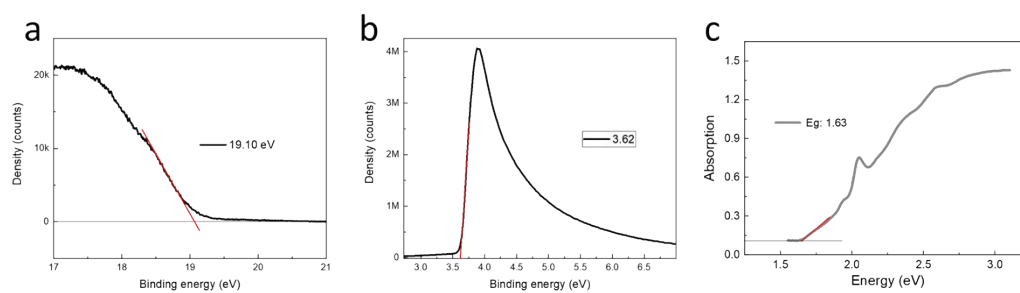

Figure S6. (a-b) UPS data of  $\text{BA}_2\text{MA}_3\text{Pb}_4\text{I}_{13}$  perovskite film. (c) The optical band gap ( $E_g$ ) fitted by absorption spectra.

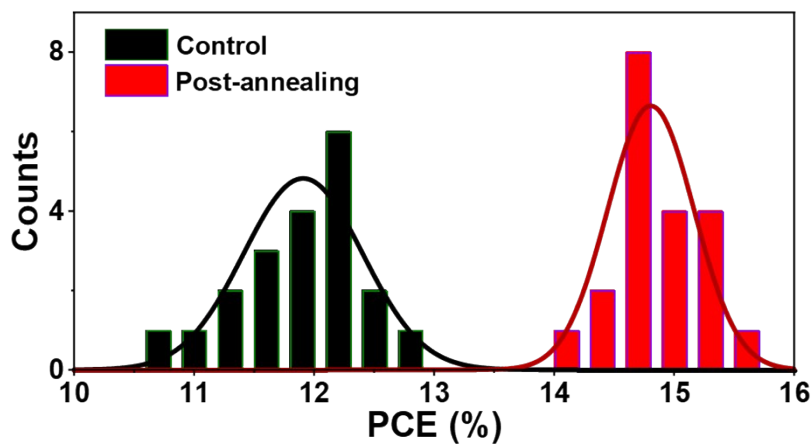

Figure S7. Histogram of statistical PCE of blade coated  $\text{BA}_2\text{MA}_3\text{Pb}_4\text{I}_{13}$  solar cells obtained from 20 devices for each processing condition.

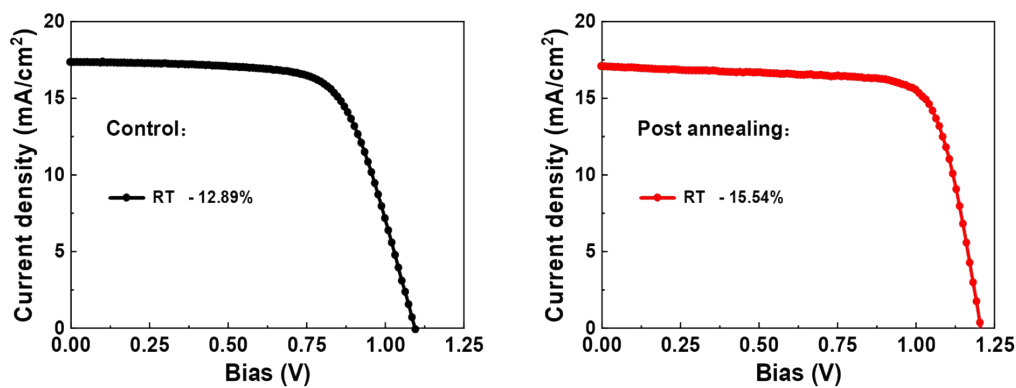

Figure S8. Current density versus voltage (J-V) characteristics of spin-coated 2D PSCs (before and after treatment with post annealing) under AM 1.5G solar irradiation ( $100 \text{ mW cm}^{-2}$ ). Inset text: extracted power conversion efficiencies (PCEs) of respective devices.
